## **Supplementary File 3: Search strategies for update of systematic review on course and prognostic factors of cognitive outcomes after traumatic brain injury**

### SEARCH DETAILS

Completed by: Cynthia Chui, MI

Submitted: April 8, 2024

Searches were conducted in MEDLINE(R) ALL (Ovid), Embase (Ovid), Cochrane Central Register of Controlled Trials (Ovid), PsycINFO (Ovid), and SCOPUS for an update of a systematic review (doi: 10.1016/j.neubiorev.2019.01.011).

Search strategies were created by Jessica Babineau for the previous systematic review, which included the use of text words and subject headings (e.g. MeSH, Emtree) related to (1) traumatic brain injury, (2) cognitive outcomes, and (3) longitudinal studies. All searches were limited to English and were updated to include articles added to the databases from December 2016 to April 8, 2024.

The updated search strategies included minor revisions (e.g. due to updates to databases):

- The keyword search field for “kw” was changed to “kf” in Medline
- MEDLINE(R) ALL was used instead of Medline and Medline in-process, which also removed the need to do a supplemental search in PubMed (due to coverage of PubMed’s citations)
- The keyword search field “kf” was added to the Embase search strategy, where appropriate and consistent with the original Medline strategy from which it was translated from

### UPDATED SEARCH – NEW RESULTS PRE-DUPLICATE REMOVAL

TOTAL Results: 31,704 citations

- MEDLINE(R) ALL: 7,291 citations
- Embase: 14,205 citations
- Cochrane Central Register of Controlled Trials: 4,046 citations
- PsycINFO: 2,027 citations
- SCOPUS: 4,135 citations

## SEARCH STRATEGIES

**Database:** Ovid MEDLINE(R) ALL <1946 to April 05, 2024>

| #  | Query                                                                                                                                                                                                                                                                             | Results<br>from 8 Apr<br>2024 |
|----|-----------------------------------------------------------------------------------------------------------------------------------------------------------------------------------------------------------------------------------------------------------------------------------|-------------------------------|
| 1  | exp brain injuries/                                                                                                                                                                                                                                                               | 84,942                        |
| 2  | Craniocerebral Trauma/                                                                                                                                                                                                                                                            | 23,904                        |
| 3  | exp Head Injuries, Closed/                                                                                                                                                                                                                                                        | 15,872                        |
| 4  | exp Skull Fractures/                                                                                                                                                                                                                                                              | 23,467                        |
| 5  | mTBI*2.tw.                                                                                                                                                                                                                                                                        | 4,114                         |
| 6  | tbi*2.tw.                                                                                                                                                                                                                                                                         | 36,323                        |
| 7  | concuss*.tw.                                                                                                                                                                                                                                                                      | 12,430                        |
| 8  | ((head* or cerebr* or crani* or capitis* or brain* or forebrain* or skull* or hemispher* or intracran* or orbit*) adj2 (injur* or trauma* or lesion* or damag* or wound* or destruction* or swell* or oedema* or edema* or fracture* or contusion* or commotion* or pressur*).tw. | 241,005                       |
| 9  | ((brain* or cerebr* or intracerebr* or crani* or intracran* or head* or subarachnoid* or subdural* or epidural* or extradural*) adj (haematoma* or hematoma* or hemorrhag* or haemorrhag* or pressur* or bleed*).tw.                                                              | 109,661                       |
| 10 | or/1-9                                                                                                                                                                                                                                                                            | 368,353                       |
| 11 | exp Spinal Cord Injuries/                                                                                                                                                                                                                                                         | 56,925                        |
| 12 | exp Central Cord Syndrome/                                                                                                                                                                                                                                                        | 145                           |
| 13 | (myelopathy adj3 (traumatic or post-traumatic)).tw,kf.                                                                                                                                                                                                                            | 149                           |
| 14 | ((spine or spinal) adj3 (fracture* or wound* or trauma* or injur* or damag*).tw,kf.                                                                                                                                                                                               | 73,696                        |
| 15 | (spinal cord adj3 (contusion* or laceration* or transaction* or trauma* or ischemi*).tw,kf.                                                                                                                                                                                       | 10,362                        |
| 16 | SCI.tw,kf.                                                                                                                                                                                                                                                                        | 44,055                        |
| 17 | exp Paraplegia/                                                                                                                                                                                                                                                                   | 13,619                        |
| 18 | exp Quadriplegia/                                                                                                                                                                                                                                                                 | 8,498                         |
| 19 | (paraplegia* or quadriplegia* or tetraplegia*).tw,kf.                                                                                                                                                                                                                             | 21,750                        |
| 20 | Spinal Cord Compression/                                                                                                                                                                                                                                                          | 11,977                        |
| 21 | exp Cervical Vertebrae/in                                                                                                                                                                                                                                                         | 8,470                         |
| 22 | central spinal cord syndrome.tw,kf.                                                                                                                                                                                                                                               | 11                            |
| 23 | central cord injury syndrome.tw,kf.                                                                                                                                                                                                                                               | 2                             |
| 24 | or/11-23                                                                                                                                                                                                                                                                          | 141,927                       |
| 25 | Brain Death/                                                                                                                                                                                                                                                                      | 9,611                         |
| 26 | (brain adj2 (death or dead)).tw,kf.                                                                                                                                                                                                                                               | 11,010                        |
| 27 | ((vegetat* or unawareness* or "minimally conscious") adj2 state*1).tw,kf.                                                                                                                                                                                                         | 4,326                         |
| 28 | (prolonged adj2 unawareness*).tw,kf.                                                                                                                                                                                                                                              | 11                            |
| 29 | 25 or 26 or 27 or 28                                                                                                                                                                                                                                                              | 18,877                        |
| 30 | (central nervous system adj2 trauma*).tw,kf.                                                                                                                                                                                                                                      | 450                           |

|    |                                                                             |           |
|----|-----------------------------------------------------------------------------|-----------|
| 31 | (CNS adj2 trauma*).tw,kf.                                                   | 689       |
| 32 | 10 or 24 or 29 or 30 or 31                                                  | 516,552   |
| 33 | exp Cognition/                                                              | 206,780   |
| 34 | exp Cognition Disorders/                                                    | 120,438   |
| 35 | neurocognit*.tw,kf.                                                         | 32,095    |
| 36 | (cognitive or cognition).tw,kf.                                             | 547,976   |
| 37 | Executive Function/                                                         | 20,290    |
| 38 | (executive adj2 (function* or control*)).tw,kf.                             | 43,077    |
| 39 | exp Arousal/                                                                | 134,199   |
| 40 | arous*.tw,kf.                                                               | 46,807    |
| 41 | attention*.tw,kf.                                                           | 604,528   |
| 42 | vigilan*.tw,kf.                                                             | 27,828    |
| 43 | or/33-42                                                                    | 1,332,739 |
| 44 | 32 and 43                                                                   | 45,280    |
| 45 | (dementi* or alzheimer*).tw,kf.                                             | 292,731   |
| 46 | exp dementia/                                                               | 213,631   |
| 47 | 45 or 46                                                                    | 335,329   |
| 48 | 32 and 47                                                                   | 12,213    |
| 49 | exp clinical trial/                                                         | 991,128   |
| 50 | exp Clinical Trials as Topic/                                               | 390,465   |
| 51 | multicenter studies as topic/                                               | 24,161    |
| 52 | (randomi?ed adj7 trial*).tw,kf.                                             | 547,543   |
| 53 | (controlled adj3 trial*).tw,kf.                                             | 390,180   |
| 54 | (clinical adj2 trial*).tw,kf.                                               | 529,062   |
| 55 | ((single or doubl* or tripl* or treb*) and (blind* or mask*)).tw,kf.        | 232,825   |
| 56 | ("4 arm" or "four arm").tw,kf.                                              | 1,670     |
| 57 | or/49-56                                                                    | 1,821,693 |
| 58 | Case-Control Studies/                                                       | 332,839   |
| 59 | Control Groups/                                                             | 2,121     |
| 60 | Matched-Pair Analysis/                                                      | 5,192     |
| 61 | retrospective studies/                                                      | 1,192,752 |
| 62 | ((case* adj5 control*) or (case adj3 comparison*) or control group*).tw,kf. | 802,897   |
| 63 | or/58-62                                                                    | 2,112,236 |
| 64 | cohort studies/                                                             | 339,626   |
| 65 | longitudinal studies/                                                       | 170,572   |
| 66 | follow-up studies/                                                          | 696,399   |
| 67 | prospective studies/                                                        | 684,096   |
| 68 | cohort.tw,kf.                                                               | 849,410   |
| 69 | longitudinal.tw,kf.                                                         | 348,596   |
| 70 | prospective.tw,kf.                                                          | 753,511   |
| 71 | retrospective.tw,kf.                                                        | 805,030   |

|    |                                                                       |            |
|----|-----------------------------------------------------------------------|------------|
| 72 | or/64-71                                                              | 3,053,182  |
| 73 | controlled before-after studies/ or interrupted time series analysis/ | 2,745      |
| 74 | 57 or 63 or 72 or 73                                                  | 5,497,589  |
| 75 | 44 and 74                                                             | 14,198     |
| 76 | 48 and 74                                                             | 2,875      |
| 77 | 75 or 76                                                              | 15,693     |
| 78 | limit 77 to english language                                          | 15,091     |
| 79 | (201612* or 2017* or 2018* or 2019* or 202*).dt,ez,da.                | 11,249,056 |
| 80 | 78 and 79                                                             | 7,291      |

**Database:** Embase <1974 to 2024 April 05>

| #  | Query                                                                                                                                                                                                                                                                              | Results from<br>8 Apr 2024 |
|----|------------------------------------------------------------------------------------------------------------------------------------------------------------------------------------------------------------------------------------------------------------------------------------|----------------------------|
| 1  | exp brain injury/                                                                                                                                                                                                                                                                  | 220,790                    |
| 2  | head injury/                                                                                                                                                                                                                                                                       | 53,882                     |
| 3  | mTBI*2.tw.                                                                                                                                                                                                                                                                         | 6,425                      |
| 4  | tbi*2.tw.                                                                                                                                                                                                                                                                          | 59,249                     |
| 5  | concuss*.tw.                                                                                                                                                                                                                                                                       | 16,805                     |
| 6  | ((head* or cerebr* or crani* or capitis* or brain* or forebrain* or skull* or hemispher* or intracran* or orbit*) adj2 (injur* or trauma* or lesion* or damag* or wound* or destruction* or swell* or oedema* or edema* or fracture* or contusion* or commotion* or pressur*)).tw. | 322,614                    |
| 7  | ((brain* or cerebr* or intracerebr* or crani* or intracran* or head* or subarachnoid* or subdural* or epidural* or extradural*) adj (haematoma* or hematoma* or hemorrhag* or haemorrhag* or pressur* or bleed*)).tw.                                                              | 153,780                    |
| 8  | or/1-7                                                                                                                                                                                                                                                                             | 535,488                    |
| 9  | exp spinal cord injury/                                                                                                                                                                                                                                                            | 93,514                     |
| 10 | spinal cord ischemia/                                                                                                                                                                                                                                                              | 5,298                      |
| 11 | (myelopathy adj3 (traumatic or post-traumatic)).tw,kf.                                                                                                                                                                                                                             | 176                        |
| 12 | ((spine or spinal) adj3 (fracture* or wound* or trauma* or injur* or damag*)).tw,kf.                                                                                                                                                                                               | 94,862                     |
| 13 | (spinal cord adj3 (contusion* or laceration* or transaction* or trauma* or ischemi*)).tw,kf.                                                                                                                                                                                       | 13,492                     |
| 14 | SCI.tw,kf.                                                                                                                                                                                                                                                                         | 63,066                     |
| 15 | paraplegia/                                                                                                                                                                                                                                                                        | 26,769                     |
| 16 | quadriplegia/                                                                                                                                                                                                                                                                      | 21,102                     |
| 17 | (paraplegia* or quadriplegia* or tetraplegia*).tw,kf.                                                                                                                                                                                                                              | 27,982                     |
| 18 | central spinal cord syndrome.tw,kf.                                                                                                                                                                                                                                                | 12                         |
| 19 | central cord injury syndrome.tw,kf.                                                                                                                                                                                                                                                | 4                          |
| 20 | or/9-19                                                                                                                                                                                                                                                                            | 202,545                    |
| 21 | brain death/                                                                                                                                                                                                                                                                       | 16,935                     |
| 22 | (brain adj2 (death or dead)).tw,kf.                                                                                                                                                                                                                                                | 17,203                     |

|    |                                                                             |           |
|----|-----------------------------------------------------------------------------|-----------|
| 23 | ((vegetat* or unawareness* or "minimally conscious") adj2 state*1).tw,kf.   | 6,049     |
| 24 | (prolonged adj2 unawareness*).tw,kf.                                        | 14        |
| 25 | 21 or 22 or 23 or 24                                                        | 28,524    |
| 26 | (central nervous system adj2 trauma*).tw,kf.                                | 558       |
| 27 | (CNS adj2 trauma*).tw,kf.                                                   | 886       |
| 28 | 8 or 20 or 25 or 26 or 27                                                   | 743,760   |
| 29 | exp cognition/                                                              | 3,092,039 |
| 30 | cognitive defect/                                                           | 225,244   |
| 31 | neurocognit*.tw,kf.                                                         | 48,033    |
| 32 | (cognitive or cognition).tw,kf.                                             | 748,913   |
| 33 | executive function/                                                         | 58,704    |
| 34 | (executive adj2 (function* or control*)).tw,kf.                             | 61,244    |
| 35 | arousal/                                                                    | 49,344    |
| 36 | arous*.tw,kf.                                                               | 62,231    |
| 37 | attention*.tw,kf.                                                           | 743,282   |
| 38 | vigilan*.tw,kf.                                                             | 38,658    |
| 39 | or/29-38                                                                    | 3,983,422 |
| 40 | exp dementia/                                                               | 461,234   |
| 41 | (dementi* or alzhem*).tw,kf.                                                | 404,373   |
| 42 | 40 or 41                                                                    | 538,513   |
| 43 | 39 or 42                                                                    | 4,293,606 |
| 44 | 28 and 43                                                                   | 150,111   |
| 45 | exp clinical trial/                                                         | 1,894,829 |
| 46 | exp "clinical trial (topic)"/                                               | 460,018   |
| 47 | (randomi?ed adj7 trial*).tw,kf.                                             | 750,641   |
| 48 | (controlled adj3 trial*).tw,kf.                                             | 512,477   |
| 49 | (clinical adj2 trial*).tw,kf.                                               | 766,686   |
| 50 | ((single or doubl* or tripl* or treb*) and (blind* or mask*)).tw,kf.        | 333,270   |
| 51 | ("4 arm" or "four arm").tw,kf.                                              | 2,362     |
| 52 | exp case control study/                                                     | 233,931   |
| 53 | control group/                                                              | 110,763   |
| 54 | clinical study/ or retrospective study/                                     | 1,756,207 |
| 55 | ((case* adj5 control*) or (case adj3 comparison*) or control group*).tw,kf. | 1,138,142 |
| 56 | cohort analysis/                                                            | 1,142,835 |
| 57 | longitudinal study/                                                         | 210,100   |
| 58 | follow up/                                                                  | 2,169,162 |
| 59 | prospective study/                                                          | 912,538   |
| 60 | cohort.tw,kf.                                                               | 1,431,145 |
| 61 | longitudinal.tw,kf.                                                         | 471,858   |
| 62 | prospective.tw,kf.                                                          | 1,153,561 |
| 63 | retrospective.tw,kf.                                                        | 1,334,636 |

|    |                                  |           |
|----|----------------------------------|-----------|
| 64 | or/45-63                         | 8,495,372 |
| 65 | 44 and 64                        | 47,701    |
| 66 | limit 65 to english language     | 46,335    |
| 67 | limit 66 to embase               | 27,484    |
| 68 | limit 67 to dc=20161201-20240408 | 14,205    |

**Database:** Cochrane Central Register of Controlled Trials <2014 to Present>

| #  | Query                                                                                                                                                                                                                                                                              | Results from<br>8 Apr 2024 |
|----|------------------------------------------------------------------------------------------------------------------------------------------------------------------------------------------------------------------------------------------------------------------------------------|----------------------------|
| 1  | exp brain injuries/                                                                                                                                                                                                                                                                | 3,640                      |
| 2  | Craniocerebral Trauma/                                                                                                                                                                                                                                                             | 448                        |
| 3  | exp Head Injuries, Closed/                                                                                                                                                                                                                                                         | 751                        |
| 4  | exp Skull Fractures/                                                                                                                                                                                                                                                               | 433                        |
| 5  | mTBI*2.tw.                                                                                                                                                                                                                                                                         | 473                        |
| 6  | tbi*2.tw.                                                                                                                                                                                                                                                                          | 3,915                      |
| 7  | concuss*.tw.                                                                                                                                                                                                                                                                       | 1,011                      |
| 8  | ((head* or cerebr* or crani* or capitis* or brain* or forebrain* or skull* or hemispher* or intracran* or orbit*) adj2 (injur* or trauma* or lesion* or damag* or wound* or destruction* or swell* or oedema* or edema* or fracture* or contusion* or commotion* or pressur*)).tw. | 14,928                     |
| 9  | ((brain* or cerebr* or intracerebr* or crani* or intracran* or head* or subarachnoid* or subdural* or epidural* or extradural*) adj (haematoma* or hematoma* or hemorrhag* or haemorrhag* or pressur* or bleed*)).tw.                                                              | 10,677                     |
| 10 | or/1-9                                                                                                                                                                                                                                                                             | 25,819                     |
| 11 | exp Spinal Cord Injuries/                                                                                                                                                                                                                                                          | 2,442                      |
| 12 | exp Central Cord Syndrome/                                                                                                                                                                                                                                                         | 6                          |
| 13 | (myelopathy adj3 (traumatic or post-traumatic)).tw,kw.                                                                                                                                                                                                                             | 1                          |
| 14 | ((spine or spinal) adj3 (fracture* or wound* or trauma* or injur* or damag*)).tw,kw.                                                                                                                                                                                               | 6,718                      |
| 15 | (spinal cord adj3 (contusion* or laceration* or transaction* or trauma* or ischemi*)).tw,kw.                                                                                                                                                                                       | 476                        |
| 16 | SCI.tw,kw.                                                                                                                                                                                                                                                                         | 2,783                      |
| 17 | exp Paraplegia/                                                                                                                                                                                                                                                                    | 277                        |
| 18 | exp Quadriplegia/                                                                                                                                                                                                                                                                  | 243                        |
| 19 | (paraplegia* or quadriplegia* or tetraplegia*).tw,kf.                                                                                                                                                                                                                              | 780                        |
| 20 | Spinal Cord Compression/                                                                                                                                                                                                                                                           | 148                        |
| 21 | exp Cervical Vertebrae/in                                                                                                                                                                                                                                                          | 7                          |
| 22 | central spinal cord syndrome.tw,kw.                                                                                                                                                                                                                                                | 1                          |
| 23 | central cord injury syndrome.tw,kw.                                                                                                                                                                                                                                                | 0                          |
| 24 | or/11-23                                                                                                                                                                                                                                                                           | 8,314                      |
| 25 | Brain Death/                                                                                                                                                                                                                                                                       | 124                        |
| 26 | (brain adj2 (death or dead)).tw,kw.                                                                                                                                                                                                                                                | 510                        |

|    |                                                                           |           |
|----|---------------------------------------------------------------------------|-----------|
| 27 | ((vegetat* or unawareness* or "minimally conscious") adj2 state*1).tw,kw. | 284       |
| 28 | (prolonged adj2 unawareness*).tw,kw.                                      | 0         |
| 29 | 25 or 26 or 27 or 28                                                      | 814       |
| 30 | (central nervous system adj2 trauma*).tw,kw.                              | 6         |
| 31 | (CNS adj2 trauma*).tw,kw.                                                 | 10        |
| 32 | 10 or 24 or 29 or 30 or 31                                                | 34,326    |
| 33 | exp Cognition/                                                            | 16,081    |
| 34 | exp Cognition Disorders/                                                  | 8,282     |
| 35 | neurocognit*.tw,kw.                                                       | 5,330     |
| 36 | (cognitive or cognition).tw,kw.                                           | 102,251   |
| 37 | Executive Function/                                                       | 1,826     |
| 38 | (executive adj2 (function* or control*)).tw,kw.                           | 8,918     |
| 39 | exp Arousal/                                                              | 10,656    |
| 40 | arous*.tw,kw.                                                             | 7,289     |
| 41 | attention*.tw,kw.                                                         | 38,836    |
| 42 | vigilan*.tw,kw.                                                           | 2,990     |
| 43 | or/33-42                                                                  | 145,476   |
| 44 | 32 and 43                                                                 | 5,048     |
| 45 | (dementi* or alzhem*).tw,kw.                                              | 24,446    |
| 46 | exp dementia/                                                             | 9,216     |
| 47 | 45 or 46                                                                  | 25,456    |
| 48 | 32 and 47                                                                 | 716       |
| 49 | 44 or 48                                                                  | 5,309     |
| 50 | limit 49 to english language                                              | 5,222     |
| 51 | (2016-12* or 2017* or 2018* or 2019* or 202*).dl.                         | 1,201,099 |
| 52 | 50 and 51                                                                 | 4,046     |

**Database:** APA PsycInfo <1806 to March Week 4 2024>

| # | Query                                                                                                                                                                                                                                                                              | Results from<br>8 Apr 2024 |
|---|------------------------------------------------------------------------------------------------------------------------------------------------------------------------------------------------------------------------------------------------------------------------------------|----------------------------|
| 1 | exp traumatic brain injury/                                                                                                                                                                                                                                                        | 23,895                     |
| 2 | exp head injuries/                                                                                                                                                                                                                                                                 | 8,155                      |
| 3 | mTBI*2.tw.                                                                                                                                                                                                                                                                         | 2,626                      |
| 4 | tbi*2.tw.                                                                                                                                                                                                                                                                          | 13,660                     |
| 5 | concuss*.tw.                                                                                                                                                                                                                                                                       | 4,942                      |
| 6 | ((head* or cerebr* or crani* or capitis* or brain* or forebrain* or skull* or hemispher* or intracran* or orbit*) adj2 (injur* or trauma* or lesion* or damag* or wound* or destruction* or swell* or oedema* or edema* or fracture* or contusion* or commotion* or pressur*)).tw. | 66,877                     |

|    |                                                                                                                                                                                                                       |         |
|----|-----------------------------------------------------------------------------------------------------------------------------------------------------------------------------------------------------------------------|---------|
| 7  | ((brain* or cerebr* or intracerebr* or crani* or intracran* or head* or subarachnoid* or subdural* or epidural* or extradural*) adj (haematoma* or hematoma* or hemorrhag* or haemorrhag* or pressur* or bleed*)).tw. | 6,590   |
| 8  | or/1-7                                                                                                                                                                                                                | 73,337  |
| 9  | exp spinal cord injuries/                                                                                                                                                                                             | 6,890   |
| 10 | exp Spinal Cord/ and exp Ischemia/                                                                                                                                                                                    | 79      |
| 11 | (myelopathy adj3 (traumatic or post-traumatic)).tw.                                                                                                                                                                   | 8       |
| 12 | ((spine or spinal) adj3 (fracture* or wound* or trauma* or injur* or damag*)).tw.                                                                                                                                     | 8,330   |
| 13 | (spinal cord adj3 (contusion* or laceration* or transaction* or trauma* or ischemi*)).tw.                                                                                                                             | 1,223   |
| 14 | SCI.tw.                                                                                                                                                                                                               | 5,572   |
| 15 | paraplegia/                                                                                                                                                                                                           | 714     |
| 16 | quadriplegia/                                                                                                                                                                                                         | 246     |
| 17 | (paraplegia* or quadriplegia* or tetraplegia*).tw.                                                                                                                                                                    | 1,738   |
| 18 | central spinal cord syndrome.tw.                                                                                                                                                                                      | 0       |
| 19 | central cord injury syndrome.tw.                                                                                                                                                                                      | 0       |
| 20 | or/9-19                                                                                                                                                                                                               | 12,513  |
| 21 | (brain adj2 (death or dead)).tw.                                                                                                                                                                                      | 752     |
| 22 | ((vegetat* or unawareness* or "minimally conscious") adj2 state*1).tw.                                                                                                                                                | 1,483   |
| 23 | (prolonged adj2 unawareness*).tw.                                                                                                                                                                                     | 3       |
| 24 | 21 or 22 or 23                                                                                                                                                                                                        | 2,191   |
| 25 | (central nervous system adj2 trauma*).tw.                                                                                                                                                                             | 79      |
| 26 | (CNS adj2 trauma*).tw.                                                                                                                                                                                                | 150     |
| 27 | 8 or 20 or 24 or 25 or 26                                                                                                                                                                                             | 86,256  |
| 28 | cognition/                                                                                                                                                                                                            | 38,251  |
| 29 | cognitive impairment/                                                                                                                                                                                                 | 46,024  |
| 30 | neurocognit*.tw.                                                                                                                                                                                                      | 20,263  |
| 31 | (cognitive or cognition).tw.                                                                                                                                                                                          | 569,392 |
| 32 | exp executive function/                                                                                                                                                                                               | 25,433  |
| 33 | (executive adj2 (function* or control*)).tw.                                                                                                                                                                          | 40,531  |
| 34 | physiological arousal/                                                                                                                                                                                                | 9,012   |
| 35 | exp attention/                                                                                                                                                                                                        | 83,762  |
| 36 | arous*.tw.                                                                                                                                                                                                            | 44,063  |
| 37 | attention*.tw.                                                                                                                                                                                                        | 334,669 |
| 38 | vigilan*.tw.                                                                                                                                                                                                          | 12,415  |
| 39 | or/28-38                                                                                                                                                                                                              | 916,080 |
| 40 | (dementi* or alzhem*).tw.                                                                                                                                                                                             | 124,140 |
| 41 | exp dementia/                                                                                                                                                                                                         | 95,177  |
| 42 | alzheimer's disease/                                                                                                                                                                                                  | 57,624  |
| 43 | 40 or 41 or 42                                                                                                                                                                                                        | 125,479 |
| 44 | 39 or 43                                                                                                                                                                                                              | 983,391 |

|    |                                                                          |         |
|----|--------------------------------------------------------------------------|---------|
| 45 | 27 and 44                                                                | 26,775  |
| 46 | clinical trials/                                                         | 12,325  |
| 47 | (randomi?ed adj7 trial*).tw.                                             | 76,202  |
| 48 | (controlled adj3 trial*).tw.                                             | 61,548  |
| 49 | (clinical adj2 trial*).tw.                                               | 45,238  |
| 50 | ((single or doubl* or tripl* or treb*) and (blind* or mask*)).tw.        | 33,253  |
| 51 | ("4 arm" or "four arm").tw.                                              | 197     |
| 52 | experiment controls/                                                     | 966     |
| 53 | retrospective studies/                                                   | 988     |
| 54 | ((case* adj5 control*) or (case adj3 comparison*) or control group*).tw. | 119,702 |
| 55 | exp Longitudinal Studies/                                                | 17,471  |
| 56 | longitudinal studies/                                                    | 16,143  |
| 57 | Followup Studies/                                                        | 12,402  |
| 58 | cohort.tw.                                                               | 91,151  |
| 59 | longitudinal.tw.                                                         | 151,232 |
| 60 | prospective.tw.                                                          | 74,045  |
| 61 | retrospective.tw.                                                        | 45,775  |
| 62 | or/46-61                                                                 | 531,901 |
| 63 | 45 and 62                                                                | 4,801   |
| 64 | limit 63 to english language                                             | 4,634   |
| 65 | limit 64 to up=20161201-20240408                                         | 2,027   |

## Database: SCOPUS

Date Searches: April 8, 2024

(( (( TITLE-ABS-KEY ( "central spinal cord syndrome" ) ) OR ( TITLE-ABS-KEY ( "central cord injury syndrome" ) ) OR ( TITLE-ABS-KEY ( mtbi\* OR tbi\* OR concuss\* ) ) OR ( TITLE-ABS-KEY ( ( head\* OR cerebr\* OR crani\* OR capitis\* OR brain\* OR forebrain\* OR skull\* OR hemispher\* OR intracran\* OR orbit\* ) near/2 ( injur\* OR trauma\* OR lesion\* OR damag\* OR wound\* OR destruction\* OR swell\* ) ) ) ) OR ( TITLE-ABS-KEY ( ( head\* OR cerebr\* OR crani\* OR capitis\* OR brain\* OR forebrain\* OR skull\* OR hemispher\* OR intracran\* OR orbit\* ) near/2 ( oedema\* OR edema\* OR fracture\* OR contusion\* OR commotion\* OR pressur\* ) ) ) ) OR ( TITLE-ABS-KEY ( ( brain\* OR cerebr\* OR intracerebr\* OR crani\* OR intracran\* OR head\* OR subarachnoid\* OR subdural\* OR epidural\* OR extradural\* ) near/2 ( haematoma\* OR hematoma\* OR hemorrhag\* OR haemorrhag\* OR pressur\* OR bleed\* ) ) ) ) OR ( TITLE-ABS-KEY ( ( myelopathy AND near/3 ( traumatic OR post-traumatic ) ) ) ) OR ( TITLE-ABS-KEY ( ( spine OR spinal ) near/3 ( fracture\* OR wound\* OR trauma\* OR injur\* OR damag\* ) ) ) ) OR ( TITLE-ABS-KEY ( ( spinal AND cord AND near/3 ( contusion\* OR laceration\* OR transaction\* OR trauma\* OR ischemi\* ) ) ) ) OR ( TITLE-ABS-KEY ( ( paraplegia\* OR quadriplegia\* OR tetraplegia\* ) ) ) ) OR ( TITLE-ABS-KEY ( ( brain AND near/2 ( death OR dead ) ) ) ) OR ( TITLE-ABS-KEY ( ( vegetat\* OR unawareness\* OR "minimally conscious" ) near/2 AND state\* ) ) ) OR ( TITLE-ABS-KEY ( ( prolonged AND near/2 AND unawareness\* ) ) ) OR ( TITLE-ABS-KEY ( ( central AND nervous AND system AND near/2 AND trauma\* ) ) ) OR ( TITLE-

ABS-KEY ( ( cns AND near/2 AND trauma\* ) ) ) AND ( ( ( TITLE-ABS-KEY ( cognitive OR cognition OR neurocogniti\* ) OR TITLE-ABS-KEY ( ( executive AND near/2 ( function\* OR control\* ) ) ) ) OR ( TITLE-ABS-KEY ( arous\* OR attention\* OR vigilan\* OR dementi\* OR alzhheim\* ) ) ) ) AND ( ( ( TITLE-ABS-KEY ( ( controlled AND near/3 AND trial\* ) ) OR TITLE-ABS-KEY ( ( clinical AND near/2 AND trial\* ) ) OR TITLE-ABS-KEY ( ( ( single OR doubl\* OR tripl\* OR treb\* ) AND ( blind\* OR mask\* ) ) ) OR TITLE-ABS-KEY ( ( "4 arm" OR "four arm" ) ) OR TITLE-ABS-KEY ( ( case\* AND near/5 AND control\* ) ) OR TITLE-ABS-KEY ( ( case AND near/3 AND comparison\* ) ) OR TITLE-ABS-KEY ( control AND group\* ) OR TITLE-ABS-KEY ( cohort\* OR longitudinal OR prospective OR retrospective ) ) ) OR ( TITLE-ABS-KEY ( random\* ) ) OR ( TITLE-ABS-KEY ( ( randomized AND near/7 AND trial\* ) OR ( randomised AND near/7 AND trial\* ) ) ) ) AND ORIG-LOAD-DATE > 20161201 AND ( LIMIT-TO ( LANGUAGE , "English" ) )

Results: 4,135 citations
