## **Supplementary File 4: Search strategies for update of systematic review on sex and gender effects in clinical and functional outcomes of traumatic brain injury**

### SEARCH DETAILS

Completed by: Cynthia Chui, MI

Submitted: March 26, 2024

Searches were conducted in Cochrane Central Register of Controlled Trials (Ovid), CINAHL Ultimate (EBSCOhost), Embase (Ovid), Ovid MEDLINE (Epub Ahead of Print, In-Process & Other Non-Indexed Citations, Ovid MEDLINE(R) Daily and Ovid MEDLINE(R)), PsycINFO (Ovid), and Web of Science for an update of a systematic review (doi: 10.3389/fneur.2021.678971).

Search strategies were created by Jessica Babineau for the previous systematic review, which included the use of text words and subject headings (e.g. MeSH, Emtree) related to (1) traumatic brain injury and (2) sex or (3) gender. Searches were limited to human studies, and English language papers when possible. Case reports were excluded when possible. All searches were updated to include articles added to the database from September 2019 to March 26, 2024.

The updated search strategies included minor revisions (e.g. due to updates to databases):

- The search field for “kw” was changed to “kf” in Embase
- The search field “id” was added for PsycInfo, and “AK” for Web of Science to search for author keywords, where appropriate and consistent with the original Medline strategy from which it was translated from
- CINAHL changed to CINAHL Ultimate (broader coverage); specifying “TI” or “AB” in the search strategy, where appropriate and consistent with the original Medline strategy
- Truncation added for concuss\* and postconcuss\* in the Web of Science strategy

### UPDATED SEARCH – NEW RESULTS PRE-DUPLICATE REMOVAL

TOTAL Results: 6839 citations

- Cochrane Central Register of Controlled Trials: 1292 citations
- CINAHL Ultimate: 573 citations
- Embase: 1754 citations
- MEDLINE: 1316 citations
- PsycINFO: 351 citations
- Web of Science: 1553 citations

## SEARCH STRATEGIES

**Database:** Ovid MEDLINE: Epub Ahead of Print, In-Process & Other Non-Indexed Citations, Ovid MEDLINE(R) Daily and Ovid MEDLINE(R) <1946-Present>

| #  | Query                                                                                                                                                                                       | Results from<br>25 Mar 2024 |
|----|---------------------------------------------------------------------------------------------------------------------------------------------------------------------------------------------|-----------------------------|
| 1  | Brain Injuries/                                                                                                                                                                             | 57,218                      |
| 2  | exp Brain Injuries, Traumatic/                                                                                                                                                              | 25,933                      |
| 3  | exp Brain Concussion/                                                                                                                                                                       | 12,824                      |
| 4  | Craniocerebral Trauma/                                                                                                                                                                      | 23,892                      |
| 5  | tbi*2.tw,kf.                                                                                                                                                                                | 36,995                      |
| 6  | mtbi*2.tw,kf.                                                                                                                                                                               | 4,338                       |
| 7  | wrTBI*2.tw,kf.                                                                                                                                                                              | 17                          |
| 8  | concuss*.tw,kf.                                                                                                                                                                             | 13,642                      |
| 9  | postconcuss*.tw,kf.                                                                                                                                                                         | 1,754                       |
| 10 | ((head* or cerebr* or crani* or skull* or intracran*) adj2 (injur* or trauma* or damag* or wound* or swell* or oedema* or edema* or fracture* or contusion* or pressur*)).tw,kf.            | 102,578                     |
| 11 | ((brain* or cerebr* or intracerebr* or crani* or intracran* or head* or subdural* or epidural* or extradural*) adj (haematoma* or hematoma* or hemorrhag* or haemorrhag* or bleed*)).tw,kf. | 66,824                      |
| 12 | or/1-11                                                                                                                                                                                     | 241,567                     |
| 13 | Sex Characteristics/                                                                                                                                                                        | 62,244                      |
| 14 | exp sex distribution/                                                                                                                                                                       | 66,601                      |
| 15 | exp Gender Identity/                                                                                                                                                                        | 27,958                      |
| 16 | (sex adj2 (differenc* or charact*)).tw,kf.                                                                                                                                                  | 67,766                      |
| 17 | sex-related.tw,kf.                                                                                                                                                                          | 8,899                       |
| 18 | sex-based.tw,kf.                                                                                                                                                                            | 3,211                       |
| 19 | (sexes adj2 (differenc* or charact*)).tw,kf.                                                                                                                                                | 2,759                       |
| 20 | (gender adj2 (differenc* or charact*)).tw,kf.                                                                                                                                               | 53,107                      |
| 21 | gender-related.tw,kf.                                                                                                                                                                       | 6,249                       |
| 22 | gender-based.tw,kf.                                                                                                                                                                         | 5,861                       |
| 23 | (male? or men or man or masculin*).ti,kf.                                                                                                                                                   | 343,391                     |
| 24 | (female? or women or woman or feminin*).ti,kf.                                                                                                                                              | 489,153                     |
| 25 | sex.ti,kf.                                                                                                                                                                                  | 148,257                     |
| 26 | sexes.ti,kf.                                                                                                                                                                                | 1,862                       |
| 27 | gender*.ti,kf.                                                                                                                                                                              | 81,068                      |
| 28 | or/13-27                                                                                                                                                                                    | 1,104,451                   |
| 29 | 12 and 28                                                                                                                                                                                   | 4,961                       |
| 30 | 29 not (exp animals/ not exp humans/)                                                                                                                                                       | 4,548                       |
| 31 | case reports/                                                                                                                                                                               | 2,391,969                   |
| 32 | 30 not 31                                                                                                                                                                                   | 3,968                       |

|    |                                       |           |
|----|---------------------------------------|-----------|
| 33 | limit 32 to english language          | 3,706     |
| 34 | (201909* or 20191* or 202*).dt,ez,da. | 7,705,588 |
| 35 | 33 and 34                             | 1,316     |

**Database:** Cochrane Central Register of Controlled Trials <2014 to Present>

| #  | Query                                                                                                                                                                                       | Results from<br>25 Mar 2024 |
|----|---------------------------------------------------------------------------------------------------------------------------------------------------------------------------------------------|-----------------------------|
| 1  | Brain Injuries/                                                                                                                                                                             | 2,501                       |
| 2  | exp Brain Injuries, Traumatic/                                                                                                                                                              | 1,638                       |
| 3  | exp Brain Concussion/                                                                                                                                                                       | 660                         |
| 4  | Craniocerebral Trauma/                                                                                                                                                                      | 446                         |
| 5  | tbi*2.tw,kw.                                                                                                                                                                                | 3,891                       |
| 6  | mtbi*2.tw,kw.                                                                                                                                                                               | 470                         |
| 7  | wrTBI*2.tw,kw.                                                                                                                                                                              | 0                           |
| 8  | concuss*.tw,kw.                                                                                                                                                                             | 1,068                       |
| 9  | postconcuss*.tw,kw.                                                                                                                                                                         | 319                         |
| 10 | ((head* or cerebr* or crani* or skull* or intracran*) adj2 (injur* or trauma* or damag* or wound* or swell* or oedema* or edema* or fracture* or contusion* or pressur*)).tw,kw.            | 6,969                       |
| 11 | ((brain* or cerebr* or intracerebr* or crani* or intracran* or head* or subdural* or epidural* or extradural*) adj (haematoma* or hematoma* or hemorrhag* or haemorrhag* or bleed*)).tw,kw. | 9,532                       |
| 12 | or/1-11                                                                                                                                                                                     | 21,212                      |
| 13 | Sex Characteristics/                                                                                                                                                                        | 1,650                       |
| 14 | exp sex distribution/                                                                                                                                                                       | 982                         |
| 15 | exp Gender Identity/                                                                                                                                                                        | 380                         |
| 16 | (sex adj2 (differenc* or charact*)).tw,kw.                                                                                                                                                  | 6,515                       |
| 17 | sex-related.tw,kw.                                                                                                                                                                          | 359                         |
| 18 | sex-based.tw,kw.                                                                                                                                                                            | 160                         |
| 19 | (sexes adj2 (differenc* or charact*)).tw,kw.                                                                                                                                                | 89                          |
| 20 | (gender adj2 (differenc* or charact*)).tw,kw.                                                                                                                                               | 3,028                       |
| 21 | gender-related.tw,kw.                                                                                                                                                                       | 242                         |
| 22 | gender-based.tw,kw.                                                                                                                                                                         | 313                         |
| 23 | (male? or men or man or masculin*).ti,kw.                                                                                                                                                   | 426,415                     |
| 24 | (female? or women or woman or feminin*).ti,kw.                                                                                                                                              | 496,189                     |
| 25 | sex.ti,kw.                                                                                                                                                                                  | 11,056                      |
| 26 | sexes.ti,kw.                                                                                                                                                                                | 33                          |
| 27 | gender*.ti,kw.                                                                                                                                                                              | 15,281                      |
| 28 | or/13-27                                                                                                                                                                                    | 569,609                     |
| 29 | 12 and 28                                                                                                                                                                                   | 7,146                       |
| 30 | 29 not (exp animals/ not exp humans/)                                                                                                                                                       | 7,132                       |

|    |                                                      |         |
|----|------------------------------------------------------|---------|
| 31 | case reports/                                        | 0       |
| 32 | 30 not 31                                            | 7,132   |
| 33 | limit 32 to english language                         | 6,982   |
| 34 | limit 33 to conference proceeding                    | 2,585   |
| 35 | 33 not 34                                            | 4,397   |
| 36 | (2019-09* or 2019-1* or 2022* or 2023* or 2024*).dl. | 341,603 |
| 37 | 35 and 36                                            | 1,292   |

**Database:** Embase <1974 to 2024 March 22>

| #  | Query                                                                                                                                                                                       | Results from<br>25 Mar 2024 |
|----|---------------------------------------------------------------------------------------------------------------------------------------------------------------------------------------------|-----------------------------|
| 1  | exp traumatic brain injury/                                                                                                                                                                 | 70,114                      |
| 2  | brain injury/                                                                                                                                                                               | 98,960                      |
| 3  | exp concussion/                                                                                                                                                                             | 16,737                      |
| 4  | head injury/                                                                                                                                                                                | 53,815                      |
| 5  | tbi*2.tw,kf.                                                                                                                                                                                | 60,091                      |
| 6  | mtbi*2.tw,kf.                                                                                                                                                                               | 6,955                       |
| 7  | wrTBI*2.tw,kf.                                                                                                                                                                              | 24                          |
| 8  | concuss*.tw,kf.                                                                                                                                                                             | 18,566                      |
| 9  | postconcuss*.tw,kf.                                                                                                                                                                         | 2,335                       |
| 10 | ((head* or cerebr* or crani* or skull* or intracran*) adj2 (injur* or trauma* or damag* or wound* or swell* or oedema* or edema* or fracture* or contusion* or pressur*)).tw,kf.            | 132,341                     |
| 11 | ((brain* or cerebr* or intracerebr* or crani* or intracran* or head* or subdural* or epidural* or extradural*) adj (haematoma* or hematoma* or hemorrhag* or haemorrhag* or bleed*)).tw,kf. | 96,812                      |
| 12 | or/1-11                                                                                                                                                                                     | 390,358                     |
| 13 | "gender and sex"/                                                                                                                                                                           | 1,262                       |
| 14 | gender identity/                                                                                                                                                                            | 23,065                      |
| 15 | (sex adj2 (differenc* or charact*)).tw,kf.                                                                                                                                                  | 87,082                      |
| 16 | sex-related.tw,kf.                                                                                                                                                                          | 10,935                      |
| 17 | sex-based.tw,kf.                                                                                                                                                                            | 4,251                       |
| 18 | (sexes adj2 (differenc* or charact*)).tw,kf.                                                                                                                                                | 3,619                       |
| 19 | (gender adj2 (differenc* or charact*)).tw,kf.                                                                                                                                               | 76,946                      |
| 20 | gender-related.tw,kf.                                                                                                                                                                       | 8,328                       |
| 21 | gender-based.tw,kf.                                                                                                                                                                         | 7,167                       |
| 22 | (male? or men or man or masculin*).ti,kf.                                                                                                                                                   | 377,045                     |
| 23 | (female? or women or woman or feminin*).ti,kf.                                                                                                                                              | 592,436                     |
| 24 | sex.ti,kf.                                                                                                                                                                                  | 165,307                     |
| 25 | sexes.ti,kf.                                                                                                                                                                                | 1,838                       |
| 26 | gender*.ti,kf.                                                                                                                                                                              | 108,989                     |

|    |                                                                                    |           |
|----|------------------------------------------------------------------------------------|-----------|
| 27 | or/13-26                                                                           | 1,209,704 |
| 28 | 12 and 27                                                                          | 7,074     |
| 29 | 28 not ((exp animals/ or exp animal experimentation/ or nonhuman/) not exp human/) | 5,859     |
| 30 | limit 29 to english language                                                       | 5,506     |
| 31 | case study/                                                                        | 99,911    |
| 32 | 30 not 31                                                                          | 5,476     |
| 33 | limit 32 to medline                                                                | 684       |
| 34 | 32 not 33                                                                          | 4,792     |
| 35 | limit 34 to dc=20190901-20240325                                                   | 1,754     |

**Database:** APA PsycInfo <1806 to March Week 4 2024>

| #  | Query                                                                                                                                                                                   | Results from<br>25 Mar 2024 |
|----|-----------------------------------------------------------------------------------------------------------------------------------------------------------------------------------------|-----------------------------|
| 1  | exp traumatic brain injury/                                                                                                                                                             | 23,895                      |
| 2  | head injuries/                                                                                                                                                                          | 4,842                       |
| 3  | tbi*2.tw                                                                                                                                                                                | 13,660                      |
| 4  | mtbi*2.tw                                                                                                                                                                               | 2,626                       |
| 5  | wrTBI*2.tw                                                                                                                                                                              | 9                           |
| 6  | concuss*.tw                                                                                                                                                                             | 4,942                       |
| 7  | postconcuss*.tw                                                                                                                                                                         | 1,027                       |
| 8  | ((head* or cerebr* or crani* or skull* or intracran*) adj2 (injur* or trauma* or damag* or wound* or swell* or oedema* or edema* or fracture* or contusion* or pressur*)).tw            | 13,850                      |
| 9  | ((brain* or cerebr* or intracerebr* or crani* or intracran* or head* or subdural* or epidural* or extradural*) adj (haematoma* or hematoma* or hemorrhag* or haemorrhag* or bleed*)).tw | 4,050                       |
| 10 | or/1-9                                                                                                                                                                                  | 39,416                      |
| 11 | human sex differences/                                                                                                                                                                  | 127,571                     |
| 12 | exp gender identity/                                                                                                                                                                    | 49,814                      |
| 13 | (sex adj2 (differenc* or charact*)).tw                                                                                                                                                  | 42,965                      |
| 14 | sex-related.tw                                                                                                                                                                          | 2,553                       |
| 15 | sex-based.tw                                                                                                                                                                            | 779                         |
| 16 | (sexes adj2 (differenc* or charact*)).tw                                                                                                                                                | 561                         |
| 17 | (gender adj2 (differenc* or charact*)).tw                                                                                                                                               | 56,977                      |
| 18 | gender-related.tw                                                                                                                                                                       | 3,676                       |
| 19 | gender-based.tw                                                                                                                                                                         | 4,464                       |
| 20 | (male? or men or man or masculin*).ti,id.                                                                                                                                               | 218,106                     |
| 21 | (female? or women or woman or feminin*).ti,id.                                                                                                                                          | 239,935                     |
| 22 | sex.ti,id.                                                                                                                                                                              | 103,652                     |
| 23 | sexes.ti,id.                                                                                                                                                                            | 705                         |

|    |                                                                                                |         |
|----|------------------------------------------------------------------------------------------------|---------|
| 24 | gender*.ti,id.                                                                                 | 107,232 |
| 25 | or/11-24                                                                                       | 600,099 |
| 26 | 10 and 25                                                                                      | 2,071   |
| 27 | limit 26 to ("0200 book" or "0240 authored book" or "0280 edited book" or "0300 encyclopedia") | 69      |
| 28 | exp case report/                                                                               | 23,405  |
| 29 | 26 not (27 or 28)                                                                              | 1,673   |
| 30 | limit 29 to english language                                                                   | 1,600   |
| 31 | limit 30 to up=20190901-20240325                                                               | 351     |

**Database:** CINAHL Ultimate

Searched: March 25, 2024

| #  | Query                        | Limiters/Expanders                                                     | Last Run Via                                                                                                 | Results |
|----|------------------------------|------------------------------------------------------------------------|--------------------------------------------------------------------------------------------------------------|---------|
| S1 | (MH "Brain Injuries+")       | Expanders - Apply equivalent subjects<br>Search modes - Boolean/Phrase | Interface - EBSCOhost<br>Research Databases<br>Search Screen - Advanced Search<br>Database - CINAHL Ultimate | 34,219  |
| S2 | (MH "Brain Concussion+")     | Expanders - Apply equivalent subjects<br>Search modes - Boolean/Phrase | Interface - EBSCOhost<br>Research Databases<br>Search Screen - Advanced Search<br>Database - CINAHL Ultimate | 6,824   |
| S3 | (MH "Head Injuries")         | Expanders - Apply equivalent subjects<br>Search modes - Boolean/Phrase | Interface - EBSCOhost<br>Research Databases<br>Search Screen - Advanced Search<br>Database - CINAHL Ultimate | 8,329   |
| S4 | TI (TBI##) OR AB (TBI##)     | Expanders - Apply equivalent subjects<br>Search modes - Boolean/Phrase | Interface - EBSCOhost<br>Research Databases<br>Search Screen - Advanced Search<br>Database - CINAHL Ultimate | 10,692  |
| S5 | TI (mTBI##) OR AB (mTBI##)   | Expanders - Apply equivalent subjects<br>Search modes - Boolean/Phrase | Interface - EBSCOhost<br>Research Databases<br>Search Screen - Advanced Search<br>Database - CINAHL Ultimate | 1,445   |
| S6 | TI (wrTBI##) OR AB (wrTBI##) | Expanders - Apply equivalent subjects                                  | Interface - EBSCOhost<br>Research Databases<br>Search Screen - Advanced                                      | 10      |

|     |                                                                                                                                                                                                                                                                                                                                                                                                                               | Search modes -<br>Boolean/Phrase                                             | Search<br>Database - CINAHL Ultimate                                                                            |        |
|-----|-------------------------------------------------------------------------------------------------------------------------------------------------------------------------------------------------------------------------------------------------------------------------------------------------------------------------------------------------------------------------------------------------------------------------------|------------------------------------------------------------------------------|-----------------------------------------------------------------------------------------------------------------|--------|
| S7  | TI (concuss*) OR AB<br>(concuss*)                                                                                                                                                                                                                                                                                                                                                                                             | Expanders - Apply<br>equivalent subjects<br>Search modes -<br>Boolean/Phrase | Interface - EBSCOhost<br>Research Databases<br>Search Screen - Advanced<br>Search<br>Database - CINAHL Ultimate | 6,803  |
| S8  | TI (postconcuss*) OR AB<br>(postconcuss*)                                                                                                                                                                                                                                                                                                                                                                                     | Expanders - Apply<br>equivalent subjects<br>Search modes -<br>Boolean/Phrase | Interface - EBSCOhost<br>Research Databases<br>Search Screen - Advanced<br>Search<br>Database - CINAHL Ultimate | 925    |
| S9  | TI ((head* or cerebr* or<br>crani* or skull* or<br>intracran*) n2 (injur* or<br>trauma* or damag* or<br>wound* or swell* or<br>oedema* or edema* or<br>fracture* or contusion* or<br>pressur*)) OR AB ((head*<br>or cerebr* or crani* or<br>skull* or intracran*) n2<br>(injur* or trauma* or<br>damag* or wound* or<br>swell* or oedema* or<br>edema* or fracture* or<br>contusion* or pressur*))                            | Expanders - Apply<br>equivalent subjects<br>Search modes -<br>Boolean/Phrase | Interface - EBSCOhost<br>Research Databases<br>Search Screen - Advanced<br>Search<br>Database - CINAHL Ultimate | 24,667 |
| S10 | TI ((brain* or cerebr* or<br>intracerebr* or crani* or<br>intracran* or head* or<br>subdural* or epidural* or<br>extradural*) n1<br>(haematoma* or hematoma*<br>or hemorrhag* or<br>haemorrhag* or bleed*))<br>OR AB ((brain* or cerebr*<br>or intracerebr* or crani* or<br>intracran* or head* or<br>subdural* or epidural* or<br>extradural*) n1<br>(haematoma* or hematoma*<br>or hemorrhag* or<br>haemorrhag* or bleed*)) | Expanders - Apply<br>equivalent subjects<br>Search modes -<br>Boolean/Phrase | Interface - EBSCOhost<br>Research Databases<br>Search Screen - Advanced<br>Search<br>Database - CINAHL Ultimate | 15,523 |
| S11 | S1 OR S2 OR S3 OR S4<br>OR S5 OR S6 OR S7 OR<br>S8 OR S9 OR S10                                                                                                                                                                                                                                                                                                                                                               | Expanders - Apply<br>equivalent subjects                                     | Interface - EBSCOhost<br>Research Databases<br>Search Screen - Advanced                                         | 73,362 |

|     |                                                                                    |                                                                        |                                                                                                              |        |
|-----|------------------------------------------------------------------------------------|------------------------------------------------------------------------|--------------------------------------------------------------------------------------------------------------|--------|
|     |                                                                                    | Search modes - Boolean/Phrase                                          | Search Database - CINAHL Ultimate                                                                            |        |
| S12 | (MH "Gender Identity+")                                                            | Expanders - Apply equivalent subjects<br>Search modes - Boolean/Phrase | Interface - EBSCOhost<br>Research Databases<br>Search Screen - Advanced Search<br>Database - CINAHL Ultimate | 10,157 |
| S13 | TI (sex n2 (differenc* or charact*)) OR AB (sex n2 (differenc* or charact*))       | Expanders - Apply equivalent subjects<br>Search modes - Boolean/Phrase | Interface - EBSCOhost<br>Research Databases<br>Search Screen - Advanced Search<br>Database - CINAHL Ultimate | 17,294 |
| S14 | TI (sex-related) OR AB (sex-related)                                               | Expanders - Apply equivalent subjects<br>Search modes - Boolean/Phrase | Interface - EBSCOhost<br>Research Databases<br>Search Screen - Advanced Search<br>Database - CINAHL Ultimate | 1,825  |
| S15 | TI (sex-based) OR AB (sex-based)                                                   | Expanders - Apply equivalent subjects<br>Search modes - Boolean/Phrase | Interface - EBSCOhost<br>Research Databases<br>Search Screen - Advanced Search<br>Database - CINAHL Ultimate | 993    |
| S16 | TI (sexes n2 (differenc* or charact*)) OR AB (sexes n2 (differenc* or charact*))   | Expanders - Apply equivalent subjects<br>Search modes - Boolean/Phrase | Interface - EBSCOhost<br>Research Databases<br>Search Screen - Advanced Search<br>Database - CINAHL Ultimate | 17,294 |
| S17 | TI (gender n2 (differenc* or charact*)) OR AB (gender n2 (differenc* or charact*)) | Expanders - Apply equivalent subjects<br>Search modes - Boolean/Phrase | Interface - EBSCOhost<br>Research Databases<br>Search Screen - Advanced Search<br>Database - CINAHL Ultimate | 23,176 |
| S18 | TI (gender-related) OR AB (gender-related)                                         | Expanders - Apply equivalent subjects<br>Search modes - Boolean/Phrase | Interface - EBSCOhost<br>Research Databases<br>Search Screen - Advanced Search<br>Database - CINAHL Ultimate | 1,803  |
| S19 | TI (male# or men or man or masculin*)                                              | Expanders - Apply equivalent subjects<br>Search modes - Boolean/Phrase | Interface - EBSCOhost<br>Research Databases<br>Search Screen - Advanced Search<br>Database - CINAHL Ultimate | 88,918 |

|     |                                                                    |                                                                        |                                                                                                              |         |
|-----|--------------------------------------------------------------------|------------------------------------------------------------------------|--------------------------------------------------------------------------------------------------------------|---------|
| S20 | TI (female# or women or woman or feminin*)                         | Expanders - Apply equivalent subjects<br>Search modes - Boolean/Phrase | Interface - EBSCOhost<br>Research Databases<br>Search Screen - Advanced Search<br>Database - CINAHL Ultimate | 222,940 |
| S21 | TI (sex or sexes or gender*)                                       | Expanders - Apply equivalent subjects<br>Search modes - Boolean/Phrase | Interface - EBSCOhost<br>Research Databases<br>Search Screen - Advanced Search<br>Database - CINAHL Ultimate | 69,117  |
| S22 | S12 OR S13 OR S14 OR S15 OR S16 OR S17 OR S18 OR S19 OR S20 OR S21 | Expanders - Apply equivalent subjects<br>Search modes - Boolean/Phrase | Interface - EBSCOhost<br>Research Databases<br>Search Screen - Advanced Search<br>Database - CINAHL Ultimate | 374,138 |
| S23 | S11 AND S22                                                        | Expanders - Apply equivalent subjects<br>Search modes - Boolean/Phrase | Interface - EBSCOhost<br>Research Databases<br>Search Screen - Advanced Search<br>Database - CINAHL Ultimate | 1,626   |
| S24 | PT (case study)                                                    | Expanders - Apply equivalent subjects<br>Search modes - Boolean/Phrase | Interface - EBSCOhost<br>Research Databases<br>Search Screen - Advanced Search<br>Database - CINAHL Ultimate | 449,333 |
| S25 | TI (case n1 (study or report))                                     | Expanders - Apply equivalent subjects<br>Search modes - Boolean/Phrase | Interface - EBSCOhost<br>Research Databases<br>Search Screen - Advanced Search<br>Database - CINAHL Ultimate | 118,802 |
| S26 | (MH "Case Studies")                                                | Expanders - Apply equivalent subjects<br>Search modes - Boolean/Phrase | Interface - EBSCOhost<br>Research Databases<br>Search Screen - Advanced Search<br>Database - CINAHL Ultimate | 27,900  |
| S27 | S24 OR S25 OR S26                                                  | Expanders - Apply equivalent subjects<br>Search modes - Boolean/Phrase | Interface - EBSCOhost<br>Research Databases<br>Search Screen - Advanced Search<br>Database - CINAHL Ultimate | 517,068 |
| S28 | S23 NOT S27                                                        | Expanders - Apply equivalent subjects<br>Search modes - Boolean/Phrase | Interface - EBSCOhost<br>Research Databases<br>Search Screen - Advanced                                      | 1,432   |

|     |                                                      |                                                                                                       |                                                                                                              |           |
|-----|------------------------------------------------------|-------------------------------------------------------------------------------------------------------|--------------------------------------------------------------------------------------------------------------|-----------|
|     |                                                      |                                                                                                       | Search Database - CINAHL Ultimate                                                                            |           |
| S29 | S28                                                  | Limiters - English Language<br>Expanders - Apply equivalent subjects<br>Search modes - Boolean/Phrase | Interface - EBSCOhost<br>Research Databases<br>Search Screen - Advanced Search<br>Database - CINAHL Ultimate | 1,427     |
| S30 | (EM 20190901- OR (ZD "in process" AND RD 20190901-)) | Limiters - English Language<br>Expanders - Apply equivalent subjects<br>Search modes - Boolean/Phrase | Interface - EBSCOhost<br>Research Databases<br>Search Screen - Advanced Search<br>Database - CINAHL Ultimate | 2,306,501 |
| S31 | S29 AND S30                                          | Expanders - Apply equivalent subjects<br>Search modes - Boolean/Phrase                                | Interface - EBSCOhost<br>Research Databases<br>Search Screen - Advanced Search<br>Database - CINAHL Ultimate | 573       |

**Database:** Web of Science Core Collection

Date Searched: March 25, 2024

(Indexes: WOS.SCI: 1900 to 2024; WOS.AHCI: 1975 to 2024; WOS.BHCI: 2005 to 2024; WOS.BSCI: 2005 to 2024; WOS.ESCI: 2005 to 2024; WOS.ISTP: 1990 to 2024; WOS.SSCI: 1900 to 2024; WOS.ISSHP: 1990 to 2024)

| #  | Search Query                                                                                                                                                                               | Results |
|----|--------------------------------------------------------------------------------------------------------------------------------------------------------------------------------------------|---------|
| 1  | TS=(tbi* OR mTBI* OR wrTBI* OR concuss OR postconcuss)                                                                                                                                     | 48329   |
| 2  | TS=((head* or cerebr* or crani* or skull* or intracran*) NEAR/2 (injur* or trauma* or damag* or wound* or swell* or oedema* or edema* or fracture* or contusion* or pressur*))             | 132810  |
| 3  | TS=((brain* or cerebr* or intracerebr* or crani* or intracran* or head* or subdural* or epidural* or extradural*) NEAR/1 (haematoma* or hematoma* or hemorrhag* or haemorrhag* or bleed*)) | 75346   |
| 4  | #1 OR #2 OR #3                                                                                                                                                                             | 231009  |
| 5  | TS=(sex NEAR/2 (differenc* OR charact*))                                                                                                                                                   | 134669  |
| 6  | TS=(sex-related)                                                                                                                                                                           | 10803   |
| 7  | TS=(sex-based)                                                                                                                                                                             | 4421    |
| 8  | TS=(sexes NEAR/2 (differenc* OR charact*))                                                                                                                                                 | 134669  |
| 9  | TS=(gender NEAR/2 (differenc* OR charact*))                                                                                                                                                | 149115  |
| 10 | TS=(gender-related)                                                                                                                                                                        | 9796    |

|    |                                                                                            |         |
|----|--------------------------------------------------------------------------------------------|---------|
| 11 | TS=(gender-based)                                                                          | 12696   |
| 12 | (TI=(male* OR men OR man OR masculin*)) OR AK=(male* OR men OR man OR masculin*)           | 638957  |
| 13 | (TI=(female* OR women OR woman OR feminin*)) OR AK=(female* OR women OR woman OR feminin*) | 898347  |
| 14 | (TI=(sex or sexes)) OR AK=(sex or sexes)                                                   | 254247  |
| 15 | #5 OR #6 OR #7 OR #8 OR #9 OR #10 OR #11 OR #12 OR #13 OR #14                              | 1830682 |
| 16 | #4 AND #15                                                                                 | 4222    |
| 17 | (#16) AND LA=(English)                                                                     | 4114    |
| 18 | #17 Timespan: 2019-09-01 to 2024-03-25                                                     | 1553    |
